# Supplementary material for: Quantitative Trait Analysis of Type 2 Diabetes Susceptibility Loci Identified From Whole Genome Association Studies in the Insulin Resistance Atherosclerosis Family Study
Source: Oxford University Press journal article supplement (doi:10.2337/db07-1169), 2008-02-06
Supplement: db071169onlineappendixfigure.doc [file db071169onlineappendixfigure.doc]

Appendix Table 1A**.** Evaluation of genetic models (dominant, additive and recessive) for T2D susceptibility loci that show evidence of association with glucose homeostasis phenotypes in the 2 degree of freedom test (2df) in the IRAS-FS Hispanic American cohort.

|  |  |  |  | Genotypic Association (P-Value) | | | |
| --- | --- | --- | --- | --- | --- | --- | --- |
| SNP | Alleles1 | MAF2 | Phenotype | 2df | Dominant | Additive | Recessive |
| *Insulin-like Growth Factor 2 mRNA-binding protein 2 (IGFBP2)* | | | | | | | |
| rs4402960 | G/T | 0.28 | SI | 0.21 | *0.096* | *0.081* | 0.35 |
| AIR | 0.46 | 0.26 | 0.21 | 0.45 |
| DI | **0.011** | **0.0042** | **0.0031** | 0.14 |
| *Cyclin-dependent Kinase 5 Regulatory Subunit Associated Protein 1-like 1 (CDKAL1)* | | | | | | | |
| rs7754840 | G/C | 0.34 | SI | 0.13 | *0.092* | **0.046** | 0.15 |
| rs10946398 | A/C | 0.34 | SI | 0.14 | 0.11 | *0.051* | 0.14 |
| rs7754840 | G/C | 0.34 | AIR | **0.0043** | **0.0010** | **0.0020** | 0.30 |
| rs10946398 | A/C | 0.34 | AIR | **0.0046** | **0.0011** | **0.0020** | 0.29 |
| rs7754840 | G/C | 0.34 | DI | 0.22 | 0.38 | 0.92 | 0.20 |
| rs10946398 | A/C | 0.34 | DI | 0.21 | 0.39 | 0.93 | 0.20 |
| *Hypothetical Gene (LOC387761)* | | | | | | | |
| rs7480010 | A/G | 0.28 | SI | 0.99 | 0.92 | 0.91 | 0.94 |
| AIR | **0.0046** | **0.0059** | **0.0011** | **0.020** |
| DI | **0.036** | **0.014** | **0.011** | 0.18 |

1Major/Minor alleles determined from the maximal set of unrelateds (n=229). Risk allele, identified from previous studies (3-6), is underlined.

2MAF; Minor Allele Frequency

Appendix Table 1B.Evaluation of genetic models (dominant, additive and recessive) for T2D susceptibility loci that show evidence of association with glucose homeostasis phenotypes in the IRAS-FS African American cohort.

|  |  |  |  | Genotypic Association (P-Value) | | | |
| --- | --- | --- | --- | --- | --- | --- | --- |
| SNP | Alleles1 | MAF2 | Phenotype | 2df | Dominant | Additive | Recessive |
| *Cyclin-dependent Kinase 5 Regulatory Subunit Associated Protein 1-like 1 (CDKAL1)* | | | | | | | |
| rs7754840 | C/G | 0.37 | SI | **0.049** | **0.037** | **0.016** | *0.074* |
| rs10946398 | C/A | 0.38 | SI | *0.063* | **0.030** | **0.027** | 0.16 |
| rs7754840 | C/G | 0.37 | AIR | 0.14 | *0.061* | 0.34 | 0.87 |
| rs10946398 | C/A | 0.38 | AIR | 0.15 | *0.068* | 0.40 | 0.78 |
| rs7754840 | C/G | 0.37 | DI | 0.44 | 0.88 | 0.33 | 0.20 |
| rs10946398 | C/A | 0.38 | DI | 0.54 | 0.80 | 0.36 | 0.27 |
| *Solute Carrier Family 30, Member 8 (SLC30A8)* | | | | | | | |
| rs13266634 | C/T | 0.11 | SI | 0.43 | 0.27 | 0.21 | 0.37 |
| AIR | 0.81 | 0.69 | 0.60 | 0.57 |
| DI | **0.050** | **0.050** | **0.021** | *0.077* |
| *Insulin-degrading Enzyme (IDE) / Kinesin Family Member 11 (KIF11) / Hematopoietically Expressed Homeobox (HHEX)* | | | | | | | |
| rs1111875 | C/T | 0.22 | SI | 0.44 | 0.38 | 0.66 | 0.49 |
| rs5015480 | C/T | 0.34 | SI | 0.88 | 0.85 | 0.68 | 0.61 |
| rs7923837 | G/A | 0.06 | SI | 0.61 | 0.33 | 0.32 | 0.71 |
| rs1111875 | C/T | 0.22 | AIR | 0.12 | **0.040** | *0.068* | 0.75 |
| rs5015480 | C/T | 0.34 | AIR | 0.34 | 0.18 | 0.15 | 0.38 |
| rs7923837 | G/A | 0.06 | AIR | *0.063* | 0.14 | 0.56 | 0.046 |
| rs1111875 | C/T | 0.22 | DI | *0.094* | **0.034** | *0.084* | 0.96 |
| rs5015480 | C/T | 0.34 | DI | 0.21 | *0.076* | 0.12 | 0.62 |
| rs7923837 | G/A | 0.06 | DI | **0.045** | *0.061* | **0.024** | *0.071* |

1Major/Minor alleles determined from the maximal set of unrelateds (n=58). Risk allele, identified from previous studies (3-6), is underlined.

2MAF; Minor Allele Frequency

Appendix Table 2A. Association analysis of T2D susceptibility loci with T2D in the IRAS-FS Hispanic American cohort1.

|  |  |  | Genotypic Proportions (%) | | |  |  |  |
| --- | --- | --- | --- | --- | --- | --- | --- | --- |
| Locus | Location | SNP | 1/1 | 1/2 | 2/2 | Additive P-Value | OR | 95% CI |
| PKN2 | 1p22.2 | rs6698181 | 75/178 (42.1) | 78/178 (43.8) | 25/178 (14.0) | 0.89182 | 1.02232 | 0.74, 1.41 |
| IGF2BP2 | 3q27.2 | rs4402960 | 91/179 (50.8) | 70/179 (39.1) | 18/179 (10.1) | 0.41624 | 1.13544 | 0.84, 1.54 |
| FLJ39370 | 4q25 | rs17044137 | 118/178 (66.3) | 55/178 (30.9) | 5/178 (2.8) | 0.30752 | 1.20292 | 0.84, 1.72 |
| CDKAL1 | 6p22.3 | rs7754840 | 72/176 (40.9) | 92/176 (52.3) | 12/176 (6.8) | 0.33915 | 1.14437 | 0.87, 1.51 |
|  |  | rs10946398 | 73/178 (41.0) | 93/178 (52.3) | 12/178 (6.7) | 0.40243 | 1.12685 | 0.85, 1.49 |
| SLC30A8 | 8q24.11 | rs13266634 | 108/181 (60.0) | 66/181 (36.5) | 7/181 (3.9) | 0.58811 | 0.89886 | 0.61, 1.32 |
| CDKN2B/CDKN2A | 9p21.3 | rs10811661 | 143/178 (80.3) | 32/178 (18.0) | 3/178 (1.7) | 0.57467 | 1.16027 | 0.69, 1.95 |
|  |  | rs564398 | 118/175 (67.4) | 54/175 (30.9) | 3/175 (1.7) | 0.17760 | 0.73705 | 0.47, 1.15 |
| IDE/KIF11/HHEX | 10q23.33 | rs1111875 | 80/181 (44.2) | 88/181 (48.6) | 13/181 (7.2) | 0.78838 | 1.05008 | 0.73, 1.50 |
|  |  | rs5015480 | 45/178 (25.3) | 94/178 (52.8) | 39/178 (21.9) | 0.83725 | 1.03827 | 0.73, 1.49 |
|  |  | rs7923837 | 55/178 (30.9) | 97/178 (54.5) | 26/178 (14.6) | 0.95899 | 1.00903 | 0.72, 1.42 |
| LOC387761 | 11p12 | rs7480010 | 102/178 (57.3) | 61/178 (34.3) | 15/178 (8.4) | 0.70771 | 0.92802 | 0.63, 1.37 |
| Intragenic | 11p12 | rs9300039 | 162/178 (91.0) | 15/178 (8.4) | 1/178 (0.6) | **0.03859** | 0.48631 | 0.25, 0.96 |
| EXT2/ALX4 | 11p11.2 | rs3740878 | 59/179 (33.0) | 81/179 (45.3) | 39/179 (21.8) | 0.22329 | 1.24807 | 0.87, 1.78 |
|  |  | rs1113132 | 59/178 (33.2) | 80/178 (44.9) | 39/178 (21.9) | 0.21819 | 1.25152 | 0.88, 1.79 |
|  |  | rs11037909 | 58/176 (33.0) | 80/176 (45.5) | 38/176 (21.6) | 0.24444 | 1.24207 | 0.86, 1.79 |
| FTO | 16q12.2 | rs8050136 | 95/176 (54.0) | 64/176 (36.4) | 17/176 (9.7) | 0.10949 | 1.31211 | 0.94, 1.83 |

1To test for an association between individual SNPs and the qualitative trait T2D, a series of generalized estimating equations (GEE1) (14) was computed. Familial correlation was accounted for by using a sandwich estimator of the variance and exchangeable correlation.

Appendix Table 2B. Association analysis of T2D susceptibility loci with T2D in the IRAS-FS African American cohort1.

|  |  |  | Genotypic Proportions | | |  |  |  |
| --- | --- | --- | --- | --- | --- | --- | --- | --- |
| Locus | Location | SNP | 1/1 | 1/2 | 2/2 | Additive P-Value | OR | 95% CI |
| PKN2 | 1p22.2 | rs6698181 | 53/69 (76.8) | 15/69 (21.7) | 1/69 (1.5) | 0.75088 | 1.10977 | 0.58, 2.11 |
| IGF2BP2 | 3q27.2 | rs4402960 | 23/69 (33.3) | 35/69 (50.7) | 11/69 (15.9) | **0.02050** | 0.59470 | 0.38, 0.92 |
| FLJ39370 | 4q25 | rs17044137 | 21/69 (30.4) | 36/69 (52.2) | 12/69 (17.4) | 0.54759 | 1.12090 | 0.77, 1.63 |
| CDKAL1 | 6p22.3 | rs7754840 | 23/68 (33.8) | 36/68 (52.9) | 9/68 (13.2) | 0.40130 | 1.20346 | 0.78, 1.85 |
|  |  | rs10946398 | 23/69 (33.3) | 37/69 (53.6) | 9/69 (13.0) | 0.38095 | 1.21404 | 0.79, 1.87 |
| SLC30A8 | 8q24.11 | rs13266634 | 58/69 (84.1) | 11/69 (15.9) | 0/69 (0.0) | 0.49851 | 0.77348 | 0.37, 1.63 |
| CDKN2B/CDKN2A | 9p21.3 | rs10811661 | 57/69 (82.6) | 11/69 (15.9) | 1/69 (1.5) | 0.41673 | 1.37818 | 0.64, 2.99 |
|  |  | rs564398 | 55/69 (79.7) | 13/69 (18.8) | 1/69 (1.5) | 0.10987 | 1.85589 | 0.87, 3.96 |
| IDE/KIF11/HHEX | 10q23.33 | rs1111875 | 46/71 (64.8) | 23/71 (32.4) | 2/71 (2.8) | 0.28770 | 0.73967 | 0.42, 1.29 |
|  |  | rs5015480 | 34/69 (49.3) | 26/69 (37.7) | 9/69 (13.0) | 0.12020 | 0.67132 | 0.41, 1.11 |
|  |  | rs7923837 | 56/69 (81.2) | 11/69 (15.9) | 2/69 (2.9) | 0.27517 | 1.37645 | 0.78, 2.44 |
| LOC387761 | 11p12 | rs7480010 | 51/69 (73.9) | 17/69 (24.6) | 1/69 (1.5) | 0.81524 | 0.90963 | 0.41, 2.01 |
| Intragenic | 11p12 | rs9300039 | 48/68 (70.6) | 18/68 (26.5) | 2/68 (2.9) | 0.20760 | 1.48284 | 0.80, 2.74 |
| EXT2/ALX4 | 11p11.2 | rs3740878 | 56/69 (81.2) | 12/69 (17.4) | 1/69 (1.5) | 0.43299 | 1.32965 | 0.65, 2.71 |
|  |  | rs1113132 | 57/69 (82.6) | 11/69 (82.6) | 1/69 (1.5) | 0.46758 | 1.32606 | 0.62, 2.84 |
|  |  | rs11037909 | 51/69 (73.9) | 12/69 (17.4) | 6/69 (8.7) | 0.27632 | 1.34423 | 0.79, 2.29 |
| FTO | 16q12.2 | rs8050136 | 14/69 (20.3) | 33/69 (47.8) | 22/69 (31.9) | 0.66842 | 0.90609 | 0.58, 1.42 |

1To test for an association between individual SNPs and the qualitative trait T2D, a series of generalized estimating equations (GEE1) (14) was computed. Familial correlation was accounted for by using a sandwich estimator of the variance and exchangeable correlation.

Appendix Table 3. Detectable effects for the 17 T2D-susceptibility loci identified from WGA studies in the IRAS Family Study with 80% power, a type I error rate of 0.05 and a population prevalence of 9.5% and 13.3% in Hispanic Americans and African Americans, respectively1.

|  |  |  |  |  |  | Hispanic Americans | | |  | African Americans | | |
| --- | --- | --- | --- | --- | --- | --- | --- | --- | --- | --- | --- | --- |
|  |  | Previously Published GWA Studies | | | | Sample Size |  |  |  | Sample Size |  |  |
| SNP | MAF2 | OR3 | OR (95% CI)4 | OR (95% CI)5 | OR (95% CI)6 | Cases/Controls | MAF | OR |  | Cases/Controls | MAF | OR |
| rs6698181 | 0.367 |  | 1.11 (1.05-1.16) | 1.21 (1.06-1.37) | 1.00 (0.92-1.09) | 178/1054 | 0.407 | 1.38 |  | 69/469 | 0.186 | 1.83 |
| rs4402960 | 0.708 |  | 1.17 (1.11-1.23) | 1.18 (1.08-1.28) | 1.11 (1.05-1.16) | 179/1057 | 0.278 | 1.41 |  | 69/471 | 0.500 | 1.68 |
| rs17044137 | 0.258 |  | 1.13 (1.06-1.19) | 1.02 (0.89-1.17) | 1.01 (0.92-1.11) | 178/1059 | 0.190 | 1.47 |  | 69/475 | 0.402 | 1.68 |
| rs7754840 | 0.692 |  | 1.08 (1.03-1.14) | 1.12 (1.03-1.22) |  | 176/1057 | 0.340 | 1.39 |  | 68/471 | 0.373 | 1.68 |
| rs10946398 | 0.692 |  |  |  | 1.16 (1.10-1.22) | 178/1068 | 0.340 | 1.39 |  | 69/472 | 0.375 | 1.68 |
| rs13266634 | 0.250 | 1.53 ± 0.31 | 1.07 (1.00-1.16) | 1.18 (1.09-1.29) | 1.12 (1.05-1.18) | 181/1072 | 0.249 | 1.43 |  | 69/478 | 0.106 | 2.07 |
| rs10811661 | 0.208 |  | 1.20 (1.12-1.28) | 1.20 (1.07-1.36) | 1.19 (1.11-1.28) | 178/1059 | 0.116 | 1.59 |  | 69/474 | 0.088 | 2.18 |
| rs564398 | 0.375 |  |  |  | 1.13 (1.08-1.19) | 175/1059 | 0.185 | 1.48 |  | 59/478 | 0.069 | 2.34 |
| rs1111875 | 0.442 | 1.44 ± 0.24 | 1.14 (1.06-1.22) | 1.10 (1.01-1.19) | 1.13 (1.07-1.19) | 181/1081 | 0.350 | 1.39 |  | 71/501 | 0.218 | 1.78 |
| rs5015480 | 0.448 |  |  |  | 178/1055 | 0.461 | 1.38 |  | 69/470 | 0.343 | 1.69 |
| rs7923837 | 0.375 | 1.45 ± 0.25 |  |  |  | 178/1061 | 0.433 | 1.38 |  | 69/478 | 0.058 | 2.48 |
| rs7480010 | 0.754 | 1.40 ± 0.25 |  | 1.03 |  | 178/1050 | 0.276 | 1.41 |  | 69/473 | 0.167 | 1.87 |
| rs9300039 | 0.108 |  | 1.16 (0.95-1.42) | 1.48 (1.28-1.71) | 1.13 (0.99-1.29) | 178/1063 | 0.086 | 1.68 |  | 68/468 | 0.176 | 1.85 |
| rs3740878 | 0.302 | 1.46 ± 0.33 |  |  |  | 179/1057 | 0.430 | 1.38 |  | 69/475 | 0.127 | 1.98 |
| rs1113132 | 0.300 | 1.36 ± 0.31 |  |  |  | 178/1051 | 0.428 | 1.38 |  | 69/475 | 0.167 | 1.87 |
| rs11037909 | 0.300 | 1.47 ±0.33 |  |  |  | 176/1048 | 0.428 | 1.38 |  | 69/471 | 0.118 | 2.02 |
| rs8050136 | 0.450 |  | 1.03 (0.91-1.17) | 1.11 (1.02-1.20) | 1.23 (1.18-1.32) | 176/1056 | 0.231 | 1.44 |  | 69/474 | 0.490 | 1.68 |

1 National Diabetes Statistics Datasheet (15)

2 Hapmap CEU minor allele frequencies

3 Sladek et al. A genome-wide association study identifies novel risk loci for type 2 diabetes. (5) (*n=2617 Cases/2894 Controls*)

4 Saxena et al. Genome-Wide Association Analysis Identifies Loci for Type 2 Diabetes and Triglyceride Levels. (3) (*n=6529 Cases/7252 Controls*)

5 Scott et al. A Genome-Wide Association Study of Type 2 Diabetes in Finns Detects Multiple Susceptibility Variants. (4) (*n=2376 Cases/2432 Controls*)

6 Zeggini et al. Replication of genome-wide association signals in UK samples reveals risk loci for type 2 diabetes. (6) (*n=5681 Cases/8284 Control*)
